# Supplementary material for: The Effect of the Supplementation of a Diet Low in Calcium and Phosphorus with Either Sheep Milk or Cow Milk on the Physical and Mechanical Characteristics of Bone using A Rat Model
Source: PubMed Central journal article supplement (PMC7466322; doi:10.3390/foods9081070), 2020-08-07
Supplement: foods-09-01070-s001.pdf [file foods-09-01070-s001.pdf]

**Table 1.** Sheep milk, cow milk, modified-AIN-93M diet, and Low Ca/P modified-AIN-93M diet mineral compositions as determined by ICP-MS %

| Diet component | Basal                                           |                                                          | Milk                                 |                                    |
|----------------|-------------------------------------------------|----------------------------------------------------------|--------------------------------------|------------------------------------|
|                | Modified-AIN-93M<br>[ $\mu\text{g}/\text{kg}$ ] | Low Ca/P modified-AIN-93M<br>[ $\mu\text{g}/\text{kg}$ ] | Sheep<br>[ $\mu\text{g}/\text{kg}$ ] | Cow<br>[ $\mu\text{g}/\text{kg}$ ] |
| Al *           | 8.32                                            | 9.68                                                     | 1.72                                 | N/A                                |
| Ba             | N/A                                             | N/A                                                      | 741                                  | 167                                |
| Ca #           | 4.5                                             | 2.17                                                     | 1.70                                 | 1.25                               |
| Ce             | 14.7                                            | 12.2                                                     | N/A                                  | N/A                                |
| Co             | 113                                             | 97.0                                                     | 164                                  | 2.05                               |
| Cr *           | 1.38                                            | 1.25                                                     | N/A                                  | N/A                                |
| Cs             | 14.0                                            | 14.2                                                     | 25.5                                 | 1.13                               |
| Cu *           | 5.60                                            | 4.72                                                     | 0.34                                 | 0.04                               |
| Er             | 1.24                                            | 1.22                                                     | N/A                                  | N/A                                |
| Fe *           | 44.7                                            | 41.8                                                     | 1.40                                 | 0.26                               |
| K #            | 6.78                                            | 6.75                                                     | 1.11                                 | 1.54                               |
| La             | 10.4                                            | 9.26                                                     | N/A                                  | N/A                                |
| Li             | 105                                             | 103                                                      | 8.88                                 | N/A                                |
| Mg *           | 557                                             | 564                                                      | 151                                  | 108                                |
| Mn *           | 9.87                                            | 8.88                                                     | 0.13                                 | 0.02                               |
| Mo             | 137                                             | 107                                                      | N/A                                  | N/A                                |
| Na #           | 4.65                                            | 4.54                                                     | 0.90                                 | 0.005                              |
| Nd             | 8.13                                            | 7.44                                                     | N/A                                  | N/A                                |
| Ni             | 527                                             | 494                                                      | 3.63                                 | N/A                                |
| P #            | 2.12                                            | 1.72                                                     | 1.42                                 | 1.06                               |
| Pb             | N/A                                             | N/A                                                      | 20.5                                 | N/A                                |
| Rb *           | 2.72                                            | 2.71                                                     | 1.80                                 | 1.92                               |
| Sr *           | 1.58                                            | 1.27                                                     | 1.52                                 | 0.53                               |
| U              | 9.07                                            | 6.15                                                     | N/A                                  | N/A                                |
| V              | 445                                             | 421                                                      | N/A                                  | N/A                                |
| Y              | 19.3                                            | 18.3                                                     | N/A                                  | N/A                                |
| Zn *           | 39.0                                            | 36.7                                                     | 5.26                                 | 4.28                               |

\* [ $\text{mg}/\text{kg}$ ]. # [ $\text{g}/\text{kg}$ ]. ^Indicates mineral present bellow detection limit (See Table S3). % Results are reported as mean  $\pm$  standard deviation from three independent replicates.

**Table 2.**  $\mu$ -CT instrument operational parameters.

| <b>Micro-CT setting</b>    | <b>Unit</b> | <b>Value</b> |
|----------------------------|-------------|--------------|
| Source Voltage             | kV          | 40           |
| Current                    | $\mu$ A     | 250          |
| Aluminum filter size       | mm          | 0.5          |
| Image pixel size           | $\mu$ m     | 17.45        |
| Frame averaging            | N/A *       | 3            |
| Random movement adjustment | N/A         | 4            |
| Rotation step              | degree      | 0.2          |

\* N/A = Not applicable.

**Table 3.** Detection limits for bone ICP-MS analysis.

| Element | Detection limit [mg/kg] | Element | Detection limit [mg/kg] |
|---------|-------------------------|---------|-------------------------|
| Na      | <40                     | Ag      | <0.05                   |
| Mg      | <44                     | Cd      | <0.1                    |
| Al      | <10                     | Sb      | <0.04                   |
| P       | <100                    | Cs      | <0.02                   |
| K       | <120                    | Ba      | <0.04                   |
| Ca      | <200                    | La      | <0.01                   |
| V       | <0.3                    | Ce      | <0.02                   |
| Cr      | <0.3                    | Pr      | <0.01                   |
| Mn      | <0.1                    | Nd      | <0.02                   |
| Fe      | <2                      | Sm      | <0.04                   |
| Co      | <0.04                   | Eu      | <0.01                   |
| Ni      | <0.1                    | Gd      | <0.03                   |
| Cu      | <0.2                    | Dy      | <0.02                   |
| Zn      | <20                     | Ho      | <0.005                  |
| As      | <0.1                    | Er      | <0.01                   |
| Se      | <0.2                    | Tm      | <0.01                   |
| Rb      | <0.04                   | Yb      | <0.01                   |
| Sr      | <0.04                   | Lu      | <0.01                   |
| Y       | <0.02                   | Pb      | <0.1                    |
| Mo      | <0.04                   | U       | <0.02                   |

**Table 4.** Parameters determined in cortical and trabecular bone using  $\mu$ -CT analysis (Reproduced from Burrow, et al. [7]).

| Characteristic                                  | Abbreviation | Bone Type  | Unit                             | Description                                                                                                                                         | Desirability in relation to bone health |
|-------------------------------------------------|--------------|------------|----------------------------------|-----------------------------------------------------------------------------------------------------------------------------------------------------|-----------------------------------------|
| Bone volume                                     | BV           | Cortical   | mm <sup>3</sup>                  | Volume of the region identified as bone within the area assessed                                                                                    |                                         |
| Bone surface                                    | BS           |            | mm <sup>2</sup>                  | Surface area of the region identified as bone within area assessed                                                                                  |                                         |
| Bone surface to volume ratio                    | BS/BV        |            | mm <sup>2</sup> /mm <sup>3</sup> | Ratio between the surface of the area identified as bone and the total volume of that area                                                          | ↑ Desirable                             |
| Bone surface density                            | BSD          |            | mm <sup>2</sup> /mm <sup>3</sup> | Ratio between the region identified as bone to the total volume of the region assessed                                                              |                                         |
| Number of pores                                 | PN           |            | number                           | Total number of all closed pores within the area assessed                                                                                           |                                         |
| Volume of pores                                 | PV           |            | mm <sup>3</sup>                  | Total volume of all open and closed pores within the area assessed                                                                                  | ↑ Undesirable                           |
| Percentage porosity                             | P %          |            | %                                | The volume of all closed pores as a percent of the total volume assessed                                                                            |                                         |
| Bone volume                                     | BV/TV        | Trabecular | %                                | Volume of the region identified as bone within the area assessed                                                                                    |                                         |
| Bone surface density                            | BS/TV        |            | mm <sup>2</sup> /mm <sup>3</sup> | Ratio between the region identified as bone to the total volume of the region assessed                                                              | ↑ Desirable                             |
| Bone surface to volume ratio                    | BS/BV        |            | mm <sup>2</sup> /mm <sup>3</sup> | Ratio between the surface of the area identified as bone and the total volume of that area                                                          |                                         |
| Trabecular pattern factor (fragmentation index) | Tb.Pf        |            | N/A*                             | An inverse measure of connectivity within the trabecular bone                                                                                       | ↑ Undesirable                           |
| Trabecular thickness                            | Tb.Th        |            | mm                               | Mean thickness of trabeculae                                                                                                                        |                                         |
| Trabecular separation                           | Tb.Ts        |            | mm                               | Mean distance between trabeculae                                                                                                                    | ↑ Desirable                             |
| Trabecular number                               | Tb.N         |            | 1/mm                             | The average number of trabeculae in a given length of bone                                                                                          |                                         |
| Degree of anisotropy                            | DA           |            | N/A*                             | A measure of 3D symmetry from 1 to infinity with 1 meaning full isotropic (homogenous) characteristic and infinity full anisotropic characteristics | ↑ Undesirable                           |
| Fractional Dimension                            | FD           |            | N/A*                             | Indicator of surface complexity                                                                                                                     | ↑ Desirable                             |

\* Unit-less measurement.
